# Supplementary material
Source: publisher figshare collection journal article supplement (https://sage.figshare.com/ndownloader/files/16832381)
Supplement: Supplementary file 1 [file 16832381]

## Supplement Figure 1

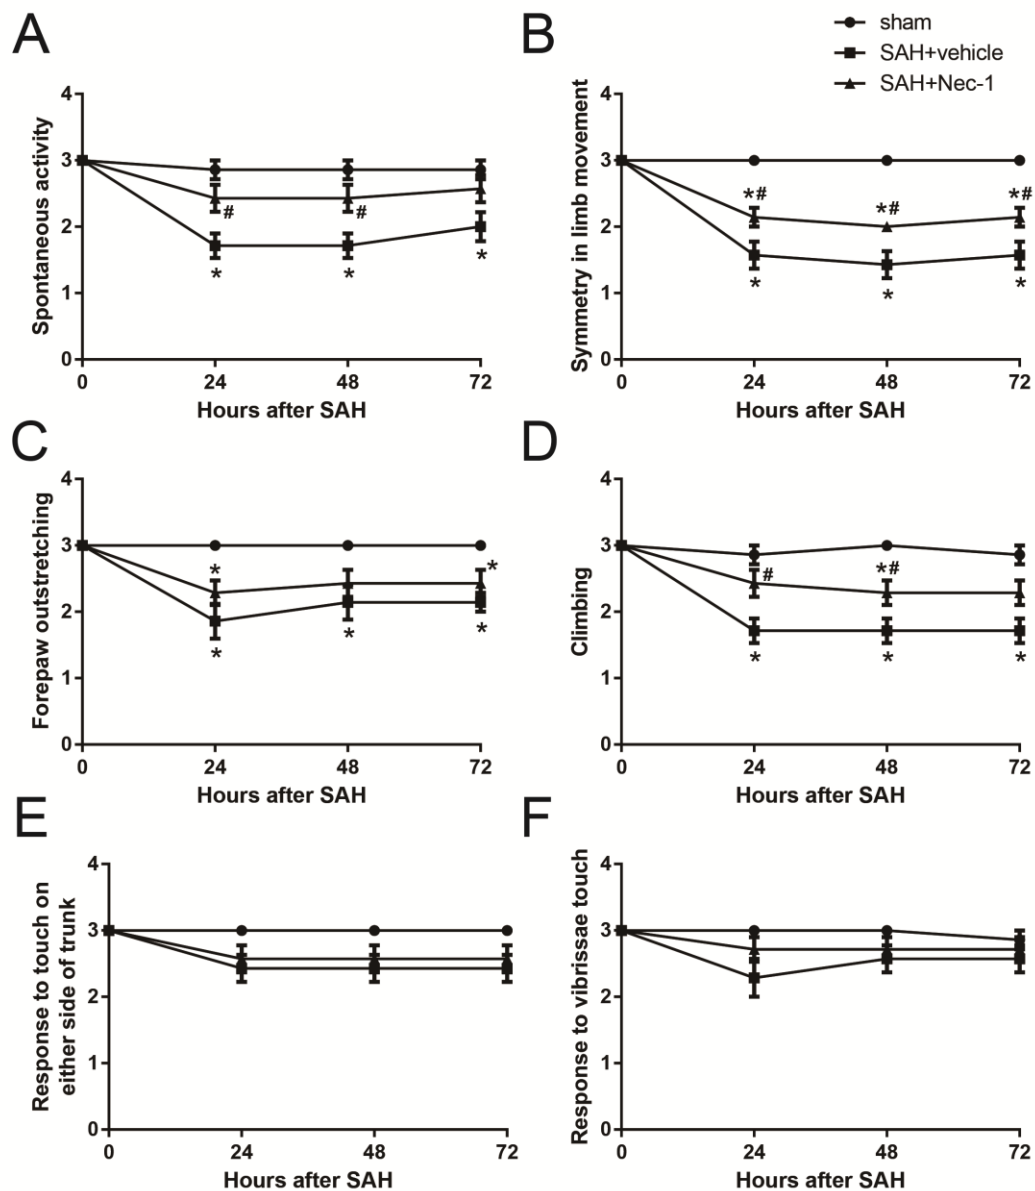

**Supplement Figure 1** The statistical diagrams of detailed scores of each neurological test. (a) Spontaneous activity. (b) Symmetry in limb movement. (c) Forepaw outstretching. (d) Climbing. (e) Response to touch on either side of trunk. (f) Response to vibrissae touch. Necrostatin-1 could significantly improve the spontaneous activity and climbing at 24 and 48 h after SAH, and improve symmetry in limb movement at each time point. The *bars* represent the mean ± SEM.  $n = 14$ . \* $P < 0.05$  versus sham at the same time point, # $P < 0.05$  versus SAH + vehicle at the same time point.
